# Supplementary material
Source: PubMed Central journal article supplement (PMC3856778)
Supplement: 1312540110_sapp.pdf [file 1312540110_sapp.pdf]

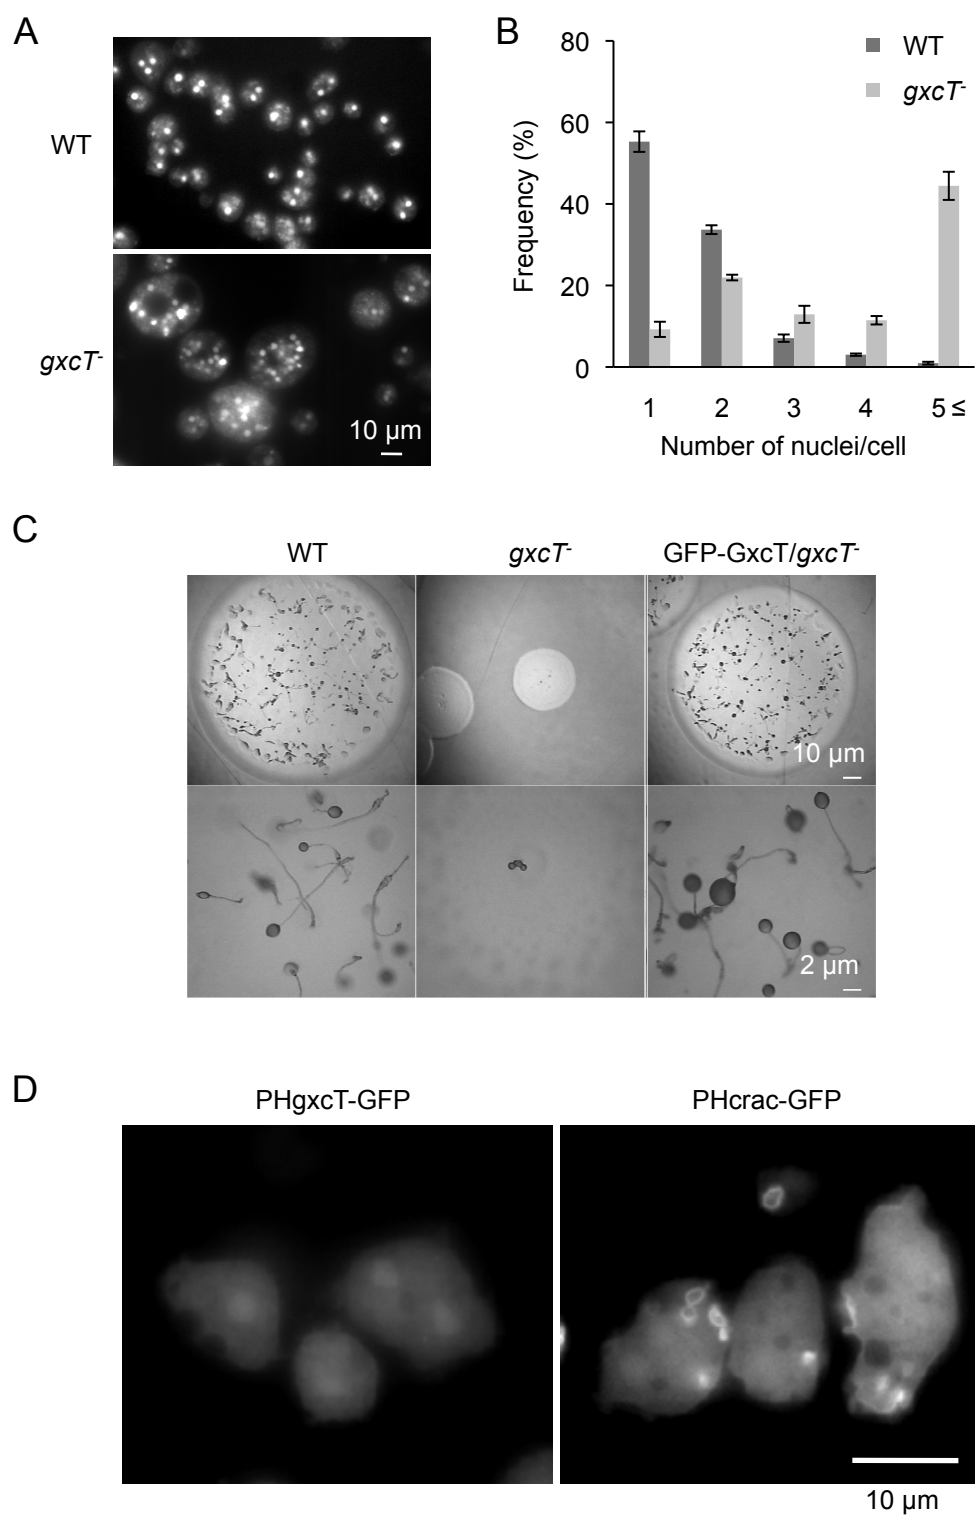

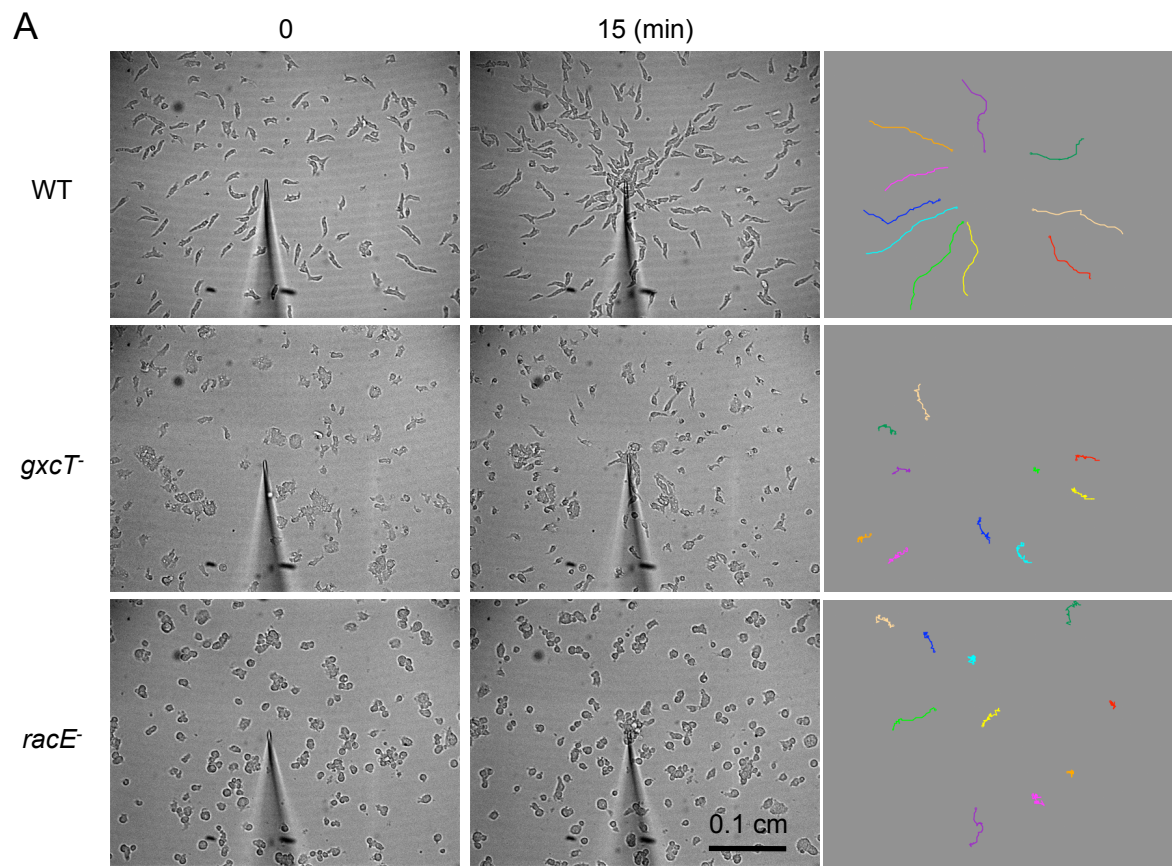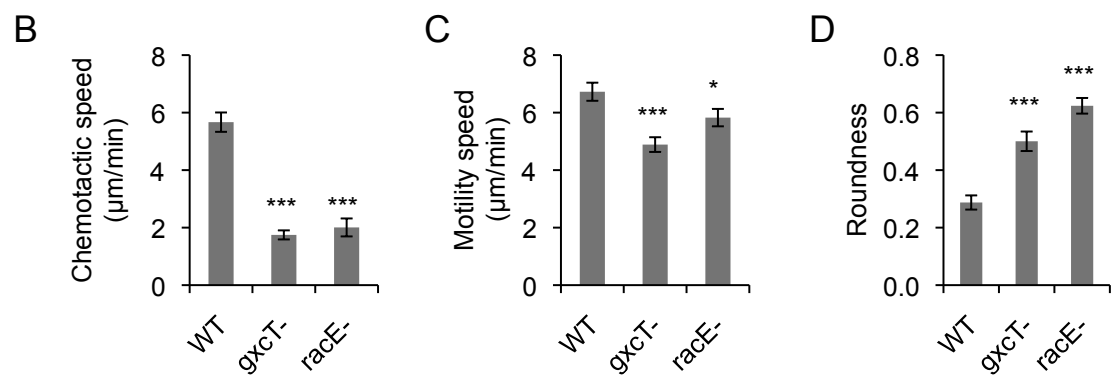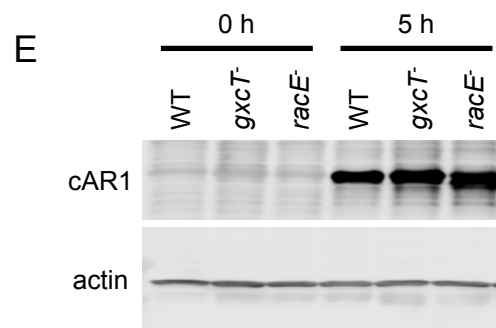

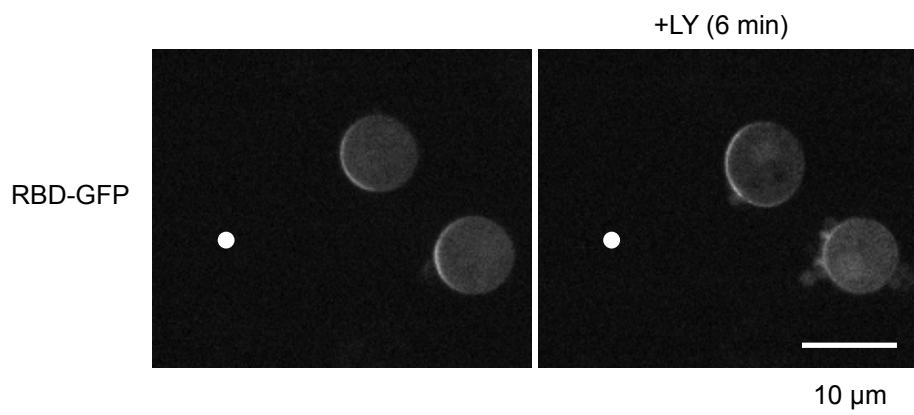

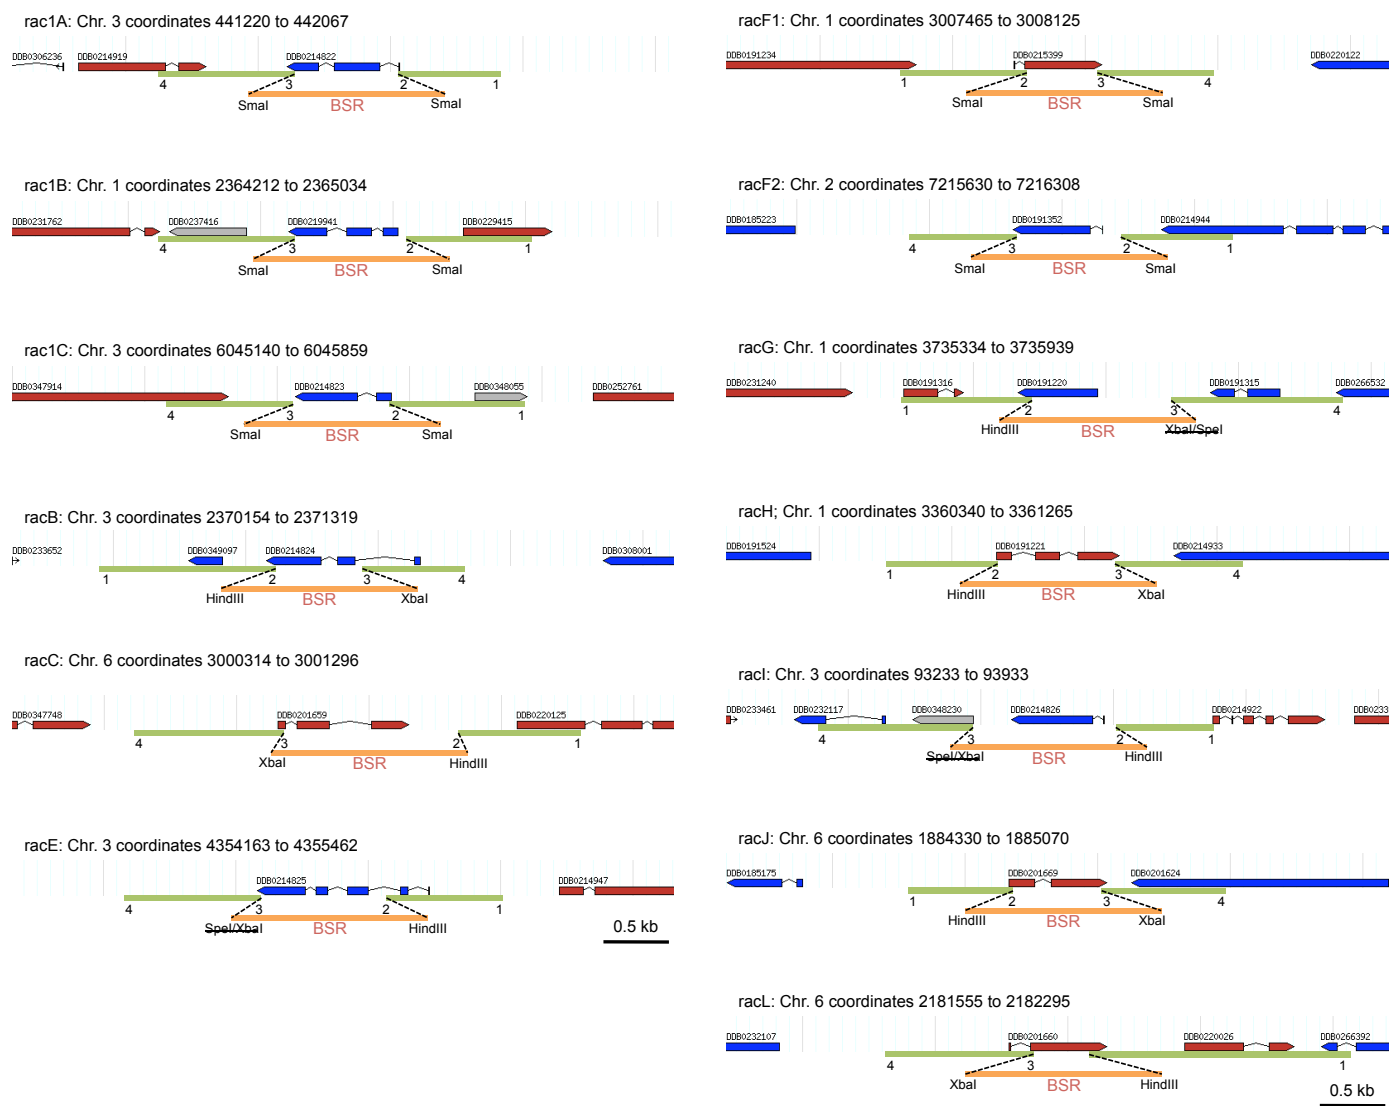

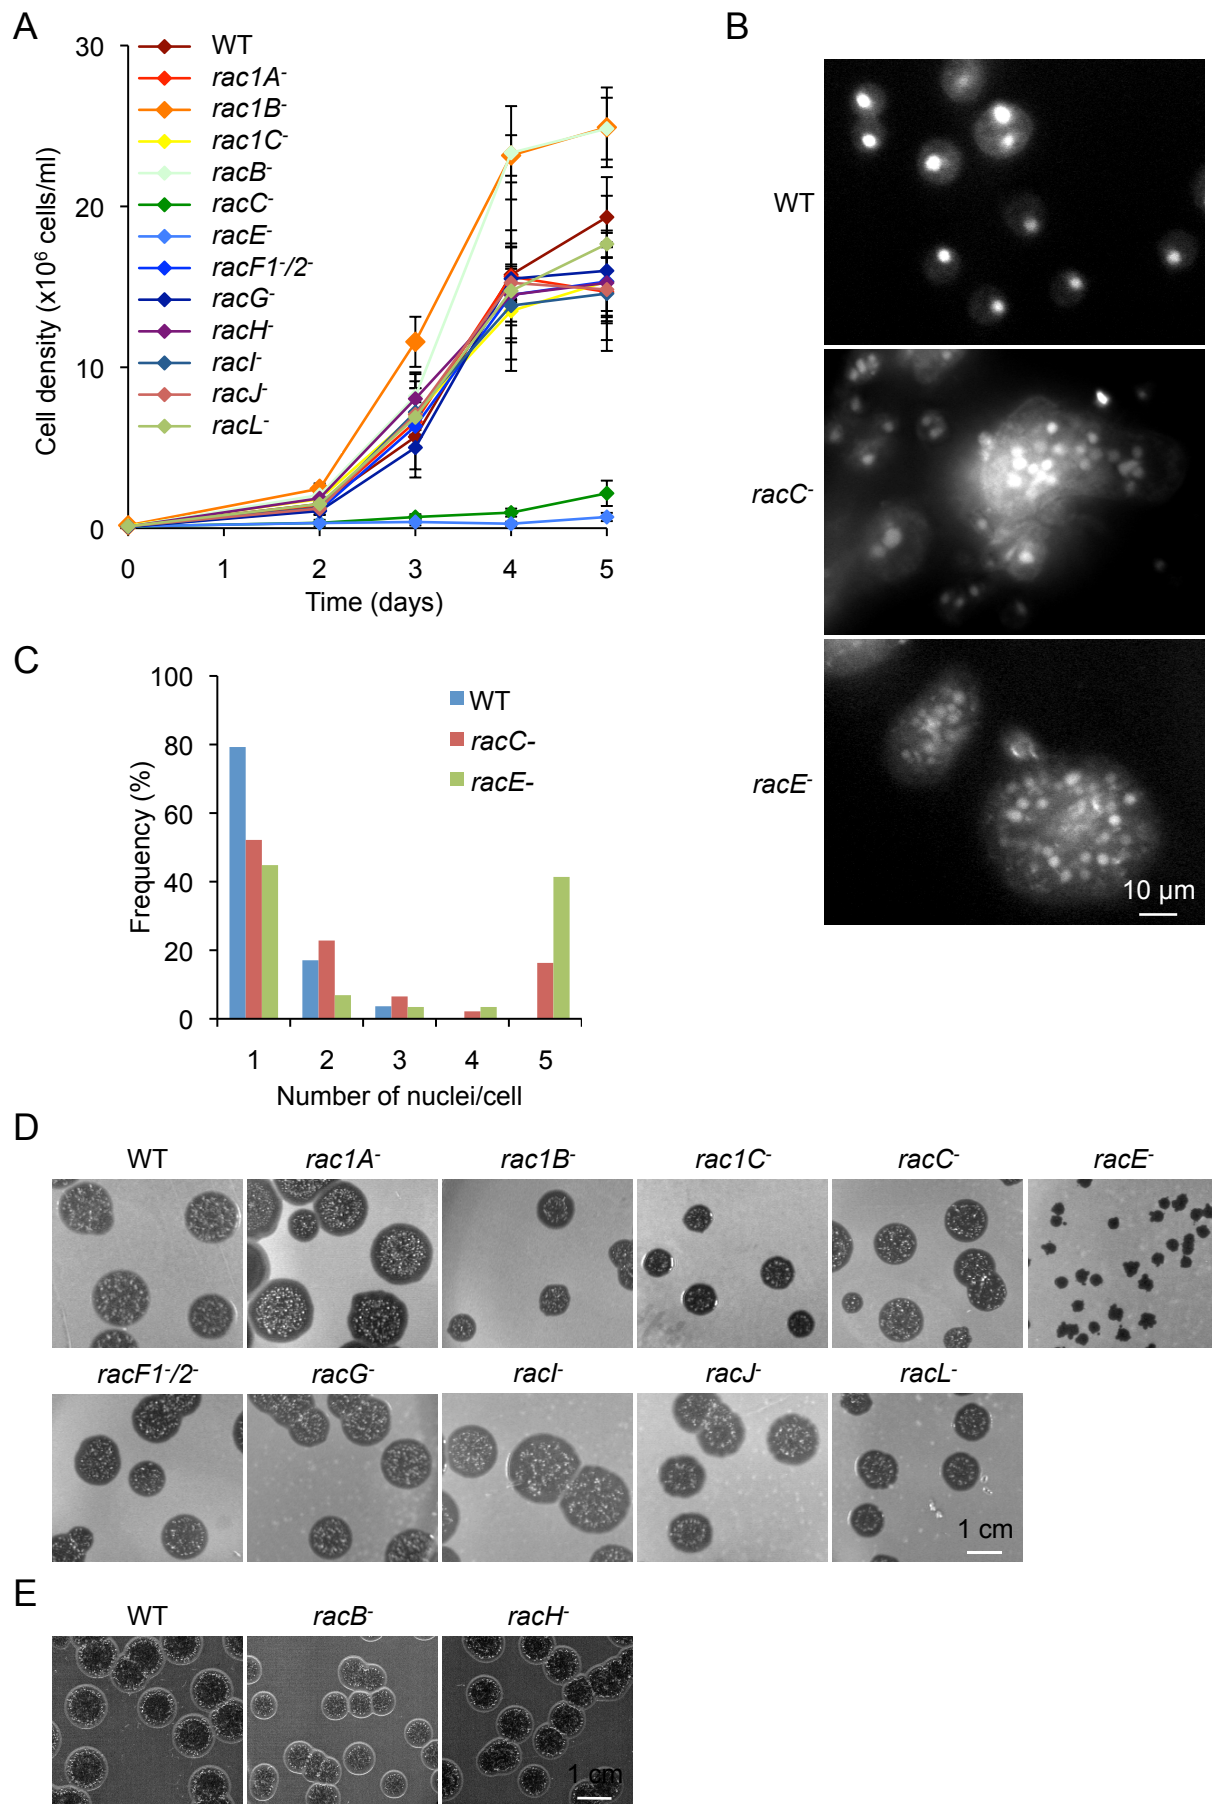

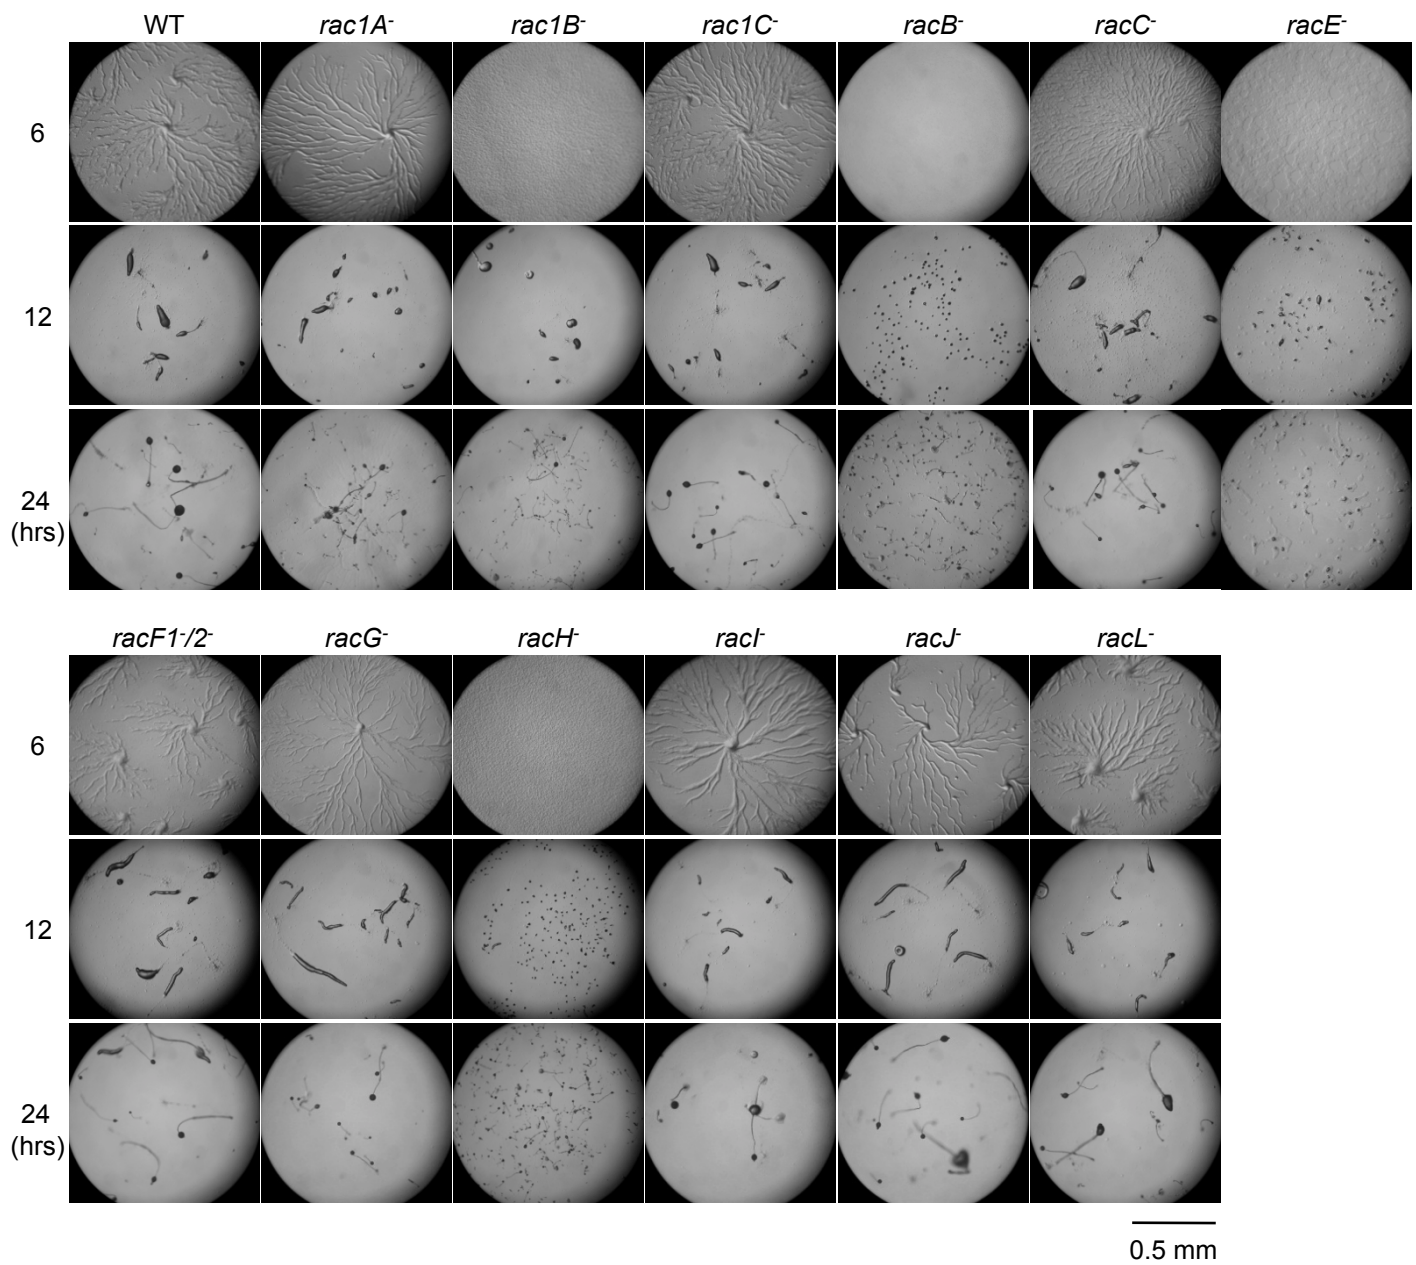

A

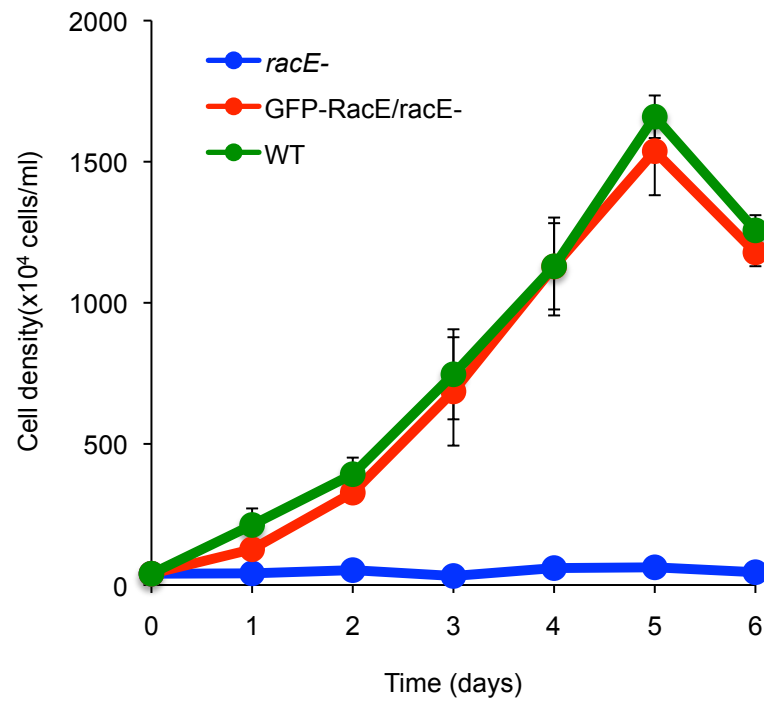

B

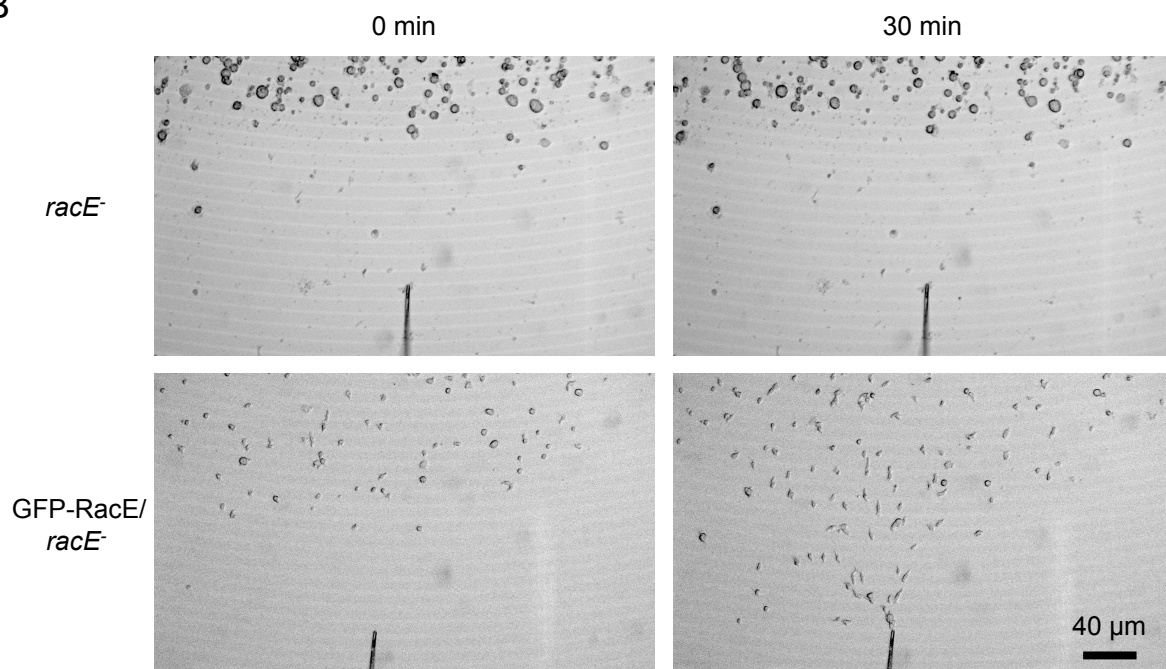

A

| Average $\Phi$ (degrees)             |                              |
|--------------------------------------|------------------------------|
|                                      | PHcrac                       |
| WT                                   | $20.8 \pm 1.9$ ( $n=22$ )    |
| <i>racE</i> <sup>-</sup>             | $35.9 \pm 5.1$ ( $n=6$ ) **  |
| RacE/ <i>racE</i> <sup>-</sup>       | $26.0 \pm 2.3$ ( $n=31$ )    |
| RacE(G20V)/ <i>racE</i> <sup>-</sup> | $35.6 \pm 3.8$ ( $n=33$ ) ** |

B

| Average $\Phi$ (degrees)             |                              |      |
|--------------------------------------|------------------------------|------|
|                                      | PHcrac                       |      |
| WT                                   | $21.4 \pm 1.6$ ( $n=17$ )    |      |
| <i>gxcT</i> <sup>-</sup>             | $36.3 \pm 5.7$ ( $n=17$ ) *  | ] ns |
| RacE(G20V)/ <i>gxcT</i> <sup>-</sup> | $45.3 \pm 5.8$ ( $n=22$ ) ** |      |

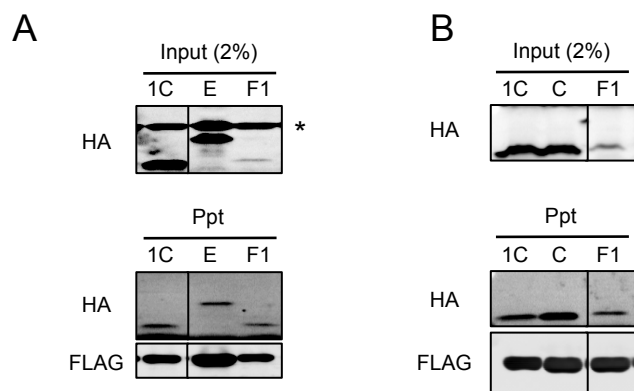

A

GFP-RacE/*racE*<sup>-</sup>

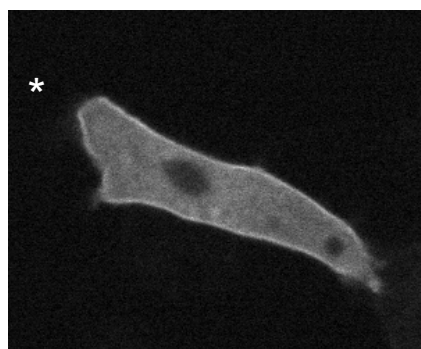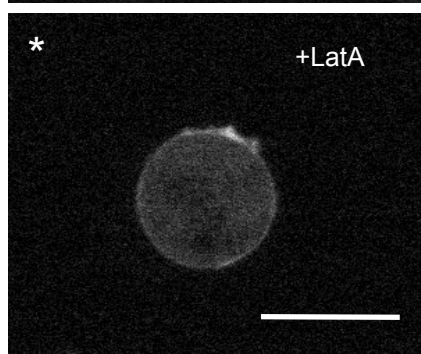

B

GFP-RacE(G20V)

LatA

0  $\mu$ M

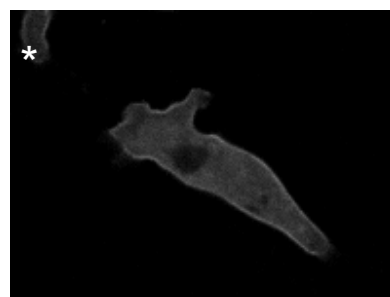

0.5  $\mu$ M

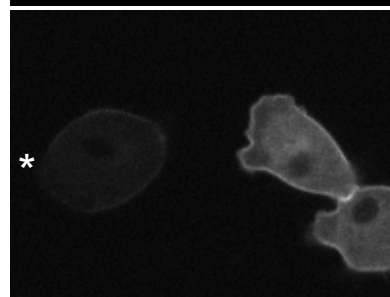

1.5  $\mu$ M

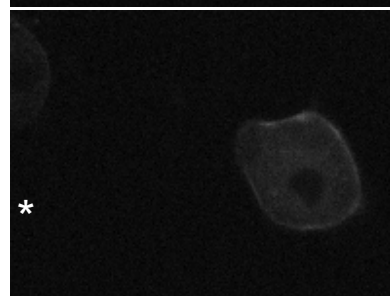

5  $\mu$ M

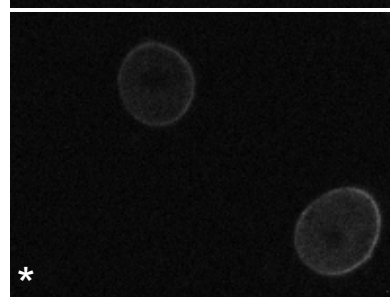

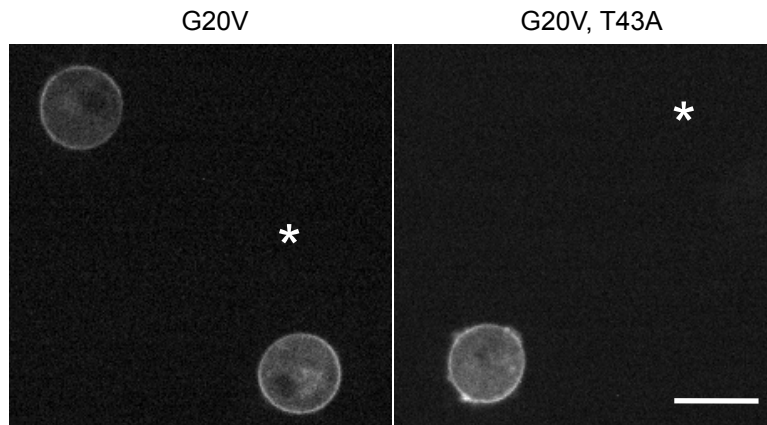

Table S1. RhoGEF genes containing DH domain in the *Dictyostelium* genome

| Gene Name                    | Gene ID      | dictyBase ID | PH domain | KO in this study | Publication             |
|------------------------------|--------------|--------------|-----------|------------------|-------------------------|
| <a href="#">DDB_G0269934</a> | DDB_G0269934 | DDB0233497   |           |                  | Zhang, et. al. (2008)   |
| <a href="#">gefC</a>         | DDB_G0282381 | DDB0215004   |           |                  | Wilkins, et. al. (2005) |
| <a href="#">gxcA</a>         | DDB_G0277987 | DDB0231342   | PH-like   |                  | Park, et.al. (2004)     |
| <a href="#">gxcAA</a>        | DDB_G0282717 | DDB0233317   | PH        |                  |                         |
| <a href="#">gxcB</a>         | DDB_G0269424 | DDB0233173   | PH        |                  | Strehle, et.al. (2006)  |
| <a href="#">gxcBB</a>        | DDB_G0277131 | DDB0233182   | PH        |                  |                         |
| <a href="#">gxcC</a>         | DDB_G0284845 | DDB0191188   | PH        |                  |                         |
| <a href="#">gxcCC</a>        | DDB_G0279123 | DDB0232239   | PH-like   |                  | Plak, et.al (2013)      |
| <a href="#">gxcD</a>         | DDB_G0267854 | DDB0231995   | PH-like   |                  |                         |
| <a href="#">gxcDD</a>        | DDB_G0279733 | DDB0348652   | PH        | X                | Mondal, et.al. (2007)   |
| <a href="#">gxcE</a>         | DDB_G0291085 | DDB0233475   | PH        |                  |                         |
| <a href="#">gxcEE</a>        | DDB_G0281047 | DDB0233446   |           |                  |                         |
| <a href="#">gxcF</a>         | DDB_G0282475 | DDB0233357   | PH        |                  |                         |
| <a href="#">gxcFF</a>        | DDB_G0284739 | DDB0233467   | PH        | X                |                         |
| <a href="#">gxcG</a>         | DDB_G0282073 | DDB0233311   | PH        |                  |                         |
| <a href="#">gxcGG</a>        | DDB_G0268354 | DDB0233491   | PH        | X                |                         |
| <a href="#">gxcH</a>         | DDB_G0288377 | DDB0233496   | PH        | X                |                         |
| <a href="#">gxcHH</a>        | DDB_G0290493 | DDB0233466   | PH        | X                |                         |
| <a href="#">gxcI</a>         | DDB_G0288383 | DDB0304693   | PH-like   | X                |                         |
| <a href="#">gxcII</a>        | DDB_G0278703 | DDB0233473   | PH        | X                |                         |
| <a href="#">gxcJ</a>         | DDB_G0293978 | DDB0233315   | PH-like   |                  |                         |
| <a href="#">gxcJJ</a>        | DDB_G0275679 | DDB0233356   | PH        | X                | Sawai, et.al. (2007)    |
| <a href="#">gxcK</a>         | DDB_G0291007 | DDB0233470   | PH        |                  |                         |
| <a href="#">gxcKK</a>        | DDB_G0293340 | DDB0233318   | PH        | X                |                         |
| <a href="#">gxcL</a>         | DDB_G0290023 | DDB0233472   | PH        |                  |                         |
| <a href="#">gxcM</a>         | DDB_G0272372 | DDB0233314   | PH        |                  | Wilkins, et.al. (2005)  |
| <a href="#">gxcN</a>         | DDB_G0277017 | DDB0233358   | PH        |                  |                         |
| <a href="#">gxcO</a>         | DDB_G0293396 | DDB0233490   | PH        | X                |                         |
| <a href="#">gxcP</a>         | DDB_G0285859 | DDB0233468   | PH        | X                |                         |
| <a href="#">gxcQ</a>         | DDB_G0284501 | DDB0233494   | PH        | X                |                         |
| <a href="#">gxcR</a>         | DDB_G0285303 | DDB0233469   | PH        | X                |                         |
| <a href="#">gxcS</a>         | DDB_G0280087 | DDB0233355   | PH        |                  |                         |
| <a href="#">gxcT</a>         | DDB_G0269610 | DDB0233444   | PH        | X                |                         |
| <a href="#">gxcU</a>         | DDB_G0291996 | DDB0233310   | PH        | X                |                         |
| <a href="#">gxcV</a>         | DDB_G0282271 | DDB0233445   | PH        | X                |                         |
| <a href="#">gxcW</a>         | DDB_G0278147 | DDB0233316   | PH        |                  |                         |
| <a href="#">gxcX</a>         | DDB_G0274889 | DDB0233493   | PH        |                  |                         |
| <a href="#">gxcY</a>         | DDB_G0293266 | DDB0233471   | PH        | X                |                         |
| <a href="#">gxcZ</a>         | DDB_G0293928 | DDB0233312   | PH-like   |                  |                         |
| <a href="#">kxcA</a>         | DDB_G0289859 | DDB0229867   | PH        | X                |                         |
| <a href="#">kxcB</a>         | DDB_G0293124 | DDB0229973   | PH        |                  |                         |
| <a href="#">myoM</a>         | DDB_G0292262 | DDB0191100   | PH        |                  | Geissler, et.al. (2000) |
| <a href="#">roco5</a>        | DDB_G0294533 | DDB0232931   | PH        |                  | Sawai, et.al. (2007)    |
| <a href="#">xacA</a>         | DDB_G0291978 | DDB0216228   | PH        |                  |                         |
| <a href="#">xacB</a>         | DDB_G0278417 | DDB0233495   | PH        | X                |                         |
| <a href="#">xacC</a>         | DDB_G0285391 | DDB0231560   | PH        | X                | Ruchira, et.al. (2004)  |

Table S2. Rho family GTPase in the *Dictyostelium* genome

**A**

| Gene  | Gene ID      | dictyBase ID | CAAX        | KO in this study | Previous publication on KO     |
|-------|--------------|--------------|-------------|------------------|--------------------------------|
| rac1A | DDB_G0277869 | DDB0214822   |             | X                |                                |
| rac1B | DDB_G0268622 | DDB0219941   |             | X                |                                |
| rac1C | DDB_G0282365 | DDB0214823   |             | X                |                                |
| racA  | DDB_G0286555 | DDB0191173   | No (RhoBTB) |                  |                                |
| racB  | DDB_G0279605 | DDB0214824   |             | X                | Park et.al. (2004)             |
| racC  | DDB_G0293526 | DDB0201659   |             | X                | Han et.al. (2006)              |
| racD  | DDB_G0291976 | DDB0216194   | No          |                  |                                |
| racE  | DDB_G0280975 | DDB0214825   |             | X                | Larochelle et.al. (1996)       |
| racF1 | DDB_G0269176 | DDB0215399   |             | X                |                                |
| racF2 | DDB_G0276967 | DDB0191352   |             | X                | Muramoto and Urushihara (2006) |
| racG  | DDB_G0269178 | DDB0191220   |             | X                | Somesh et.al. (2006)           |
| racH  | DDB_G0269240 | DDB0191221   |             | X                | Somesh et.al. (2006)           |
| racI  | DDB_G0277897 | DDB0214826   |             | X                |                                |
| racJ  | DDB_G0292560 | DDB0201669   |             | X                |                                |
| racL  | DDB_G0292816 | DDB0201660   |             | X                |                                |
| racM  | DDB_G0289103 | DDB0230015   |             |                  |                                |
| racN  | DDB_G0278009 | DDB0230036   |             |                  |                                |
| racO  | DDB_G0277791 | DDB0230035   |             |                  |                                |
| racP  | DDB_G0285453 | DDB0230013   | No          |                  |                                |
| racQ  | DDB_G0278011 | DDB0233216   |             |                  |                                |

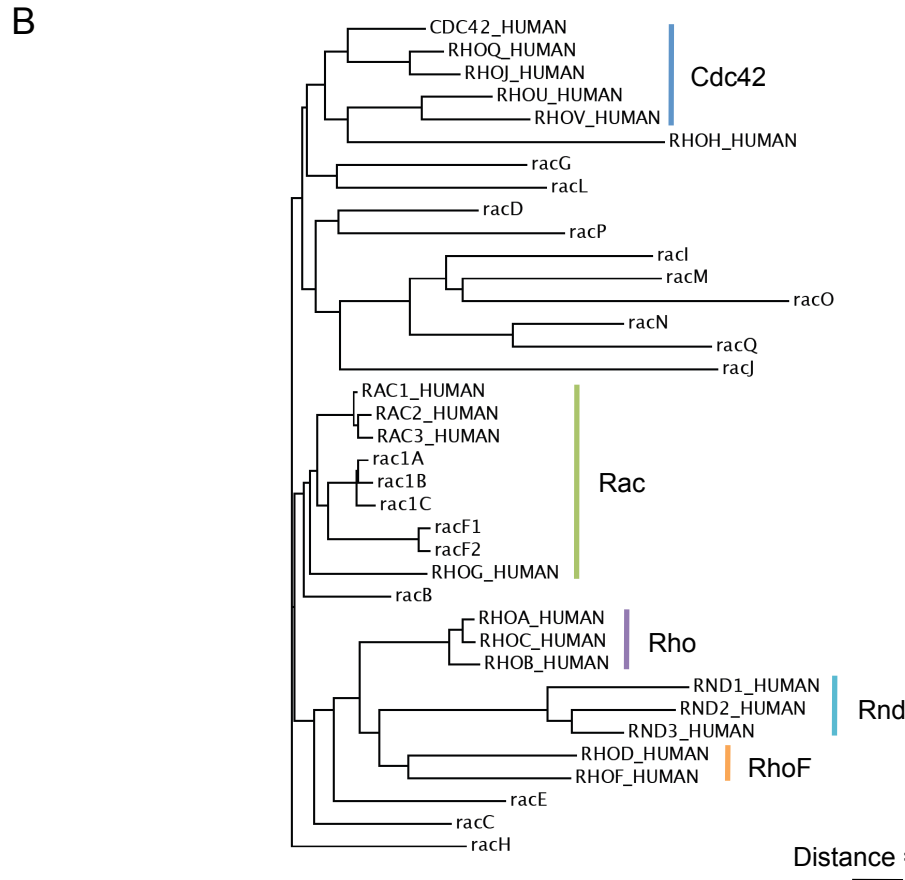

**Table S2. Phylogenetic analysis of the Rho GTPases in *Dictyostelium* and human.** (A) A list of *Dictyostelium* Rho family GTPases. The genes that have been disrupted in this and previous studies are indicated. (B) The amino acid sequences of *Dictyostelium* and human Rho family proteins were aligned using Clustal Omega - Multiple Sequence Alignment ([www.ebi.ac.uk](http://www.ebi.ac.uk)). RhoBTB proteins were excluded. A phylogenetic tree based on this alignment was created using ClustalW2 - Phylogeny ([www.ebi.ac.uk](http://www.ebi.ac.uk)). True distance correction, true gap exclusion, and the neighbor-joining method were used to create the phylogenetic tree.

Table S3. Primers for gene disruption of Rho family GTPase in the *Dictyostelium* genome

| Name    | Sequence                                  | Position in genomic DNA | Length of gene (bp) |
|---------|-------------------------------------------|-------------------------|---------------------|
| rac1A-1 | GCGGCCGCAATGTTGATATTTTCTATTTTCC           | (-774)-(-750)           | 848                 |
| rac1A-2 | CCCGGGTATACAAAACATAAATTTACCTTGC           | 3-27                    |                     |
| rac1A-3 | CCCGGGAAAGAAGAAAAGTTCAGGTGGTTGC           | 812-836                 |                     |
| rac1A-4 | GTCGACTCACTTATTTCAATCATTTGGTTTCG          | 1803-1827               |                     |
| rac1B-1 | GCGGCCGCGATTTTGAATCACAAAATTGTTTAG         | (-1000)-(-976)          | 823                 |
| rac1B-2 | CCCGGGAATTTTGTGTGTTTATGCCATTG             | (-96)-(-72)             |                     |
| rac1B-3 | CCCGGGAAAAACCAAAATCTTCAAAAGGTTG           | 786-810                 |                     |
| rac1B-4 | GTCGACATGGGTTCAAGAATTCAATAAAGTC           | 1794-1818               |                     |
| rac1C-1 | GCGGCCGCTCAGATTTTAAATGATCTAAAATGG         | (-981)-(-957)           | 720                 |
| rac1C-2 | CCCGGGTACAACACACATTTAATTGCTTGC            | 3-27                    |                     |
| rac1C-3 | CCCGGGCTAACCAACCATACTTAATGAAATG           | 739-763                 |                     |
| rac1C-4 | GTCGACTAAAATTAGAAGATATCGAATATCC           | 1632-1656               |                     |
| racB-1  | GTCGACTCAATAATAAACTATGCACTATCTG           | 2373-2397               | 1166                |
| racB-2  | AAGCTTCAAAAAGGTCTCAAACAAGTTTTCG           | 1062-1086               |                     |
| racB-3  | TCTAGAATTAGTAATCAATCAGATAACATAG           | 442-466                 |                     |
| racB-4  | GCGGCCGCCATTAACTAACCTACAATTGCTCG          | (-331)-(-307)           |                     |
| racC-1  | GTCGACGAAAAACATTATCAAACTCCATCGG           | 2203-2227               | 983                 |
| racC-2  | TTTGATCTTAAAAACAGTCTCAAGC                 | 1383-1406               |                     |
| racC-3  | TCTAGAACCTACAGCACCATCACCATAACG            | 30-55                   |                     |
| racC-4  | GCGGCCGCTAAAGCCTTTAGAGATAATTATGGC         | (-1162)-(-1138)         |                     |
| racE-1  | GTCGACTTCTAAATATAGCCAACCAATTTGG           | (-608)-(-584)           | 1300                |
| racE-2  | AAGCTTTGAAATATAGAATCCATTTGATTTG           | 326-350                 |                     |
| racE-3  | ACTAGTGAAGAGCAGGTAAAAAGAAATCTGG           | 1260-1284               |                     |
| racE-4  | GCGGCCGCTGTTGTTTTCTTAGCTTGATCG            | 2249-2271               |                     |
| racF1-1 | GCGGCCGCATACTTGTCAAAACACTAGTGC            | (-988)-(-964)           | 661                 |
| racF1-2 | CCCGGGACAACAACACATTTAATATTTTGCC           | 81-105                  |                     |
| racF1-3 | CCCGGGAAAAACCAAGAAGAAGAGTTGTAC            | 627-651                 |                     |
| racF1-4 | GTCGACTTATGAAATTGAAGTTACTAATTGG           | 1474-1498               |                     |
| racF2-1 | GCGGCCGCTTTACAAATCATATGATCCACGTGC         | (-995)-(-971)           | 679                 |
| racF2-2 | CCCGGGTTTTTTGTCCAAAATTTTCATCG             | (-172)-(-148)           |                     |
| racF2-3 | CCCGGGAAAAACCAAGAAGAAGACCTGTAC            | 645-669                 |                     |
| racF2-4 | GTCGACAGGTATTTTGGATTCAATGATTGCG           | 1429-1453               |                     |
| racG-1  | GGGGTCGACTAGTTTAAGAAGAGCACCTGATTATCATGG   | 1357-1386               | 606                 |
| racG-2  | CCCAAGCTTACATTTAGTATTTGAAAAAGCAATTGACGC   | 495-524                 |                     |
| racG-3  | GGGACTAGTTTCCTTTAGCAAAACACATAACTGAGTAGTC  | (-595)-(-566)           |                     |
| racG-4  | CCCGCGGCCGCATGAAATGGTTGATCCACCAATTTCCCATG | (-1869)-(-1840)         |                     |
| racH-1  | GTCGACATAGTAATAGCAACAATCATAATGG           | (-837)-(-813)           | 926                 |
| racH-2  | AAGCTTAACCATTAATTTAATATCTTTTACC           | 3-27                    |                     |
| racH-3  | TCTAGAAAAAAGGTGATAAAGACTCAAAGG            | 885-909                 |                     |
| racH-4  | GCGGCCGCACCAAGTAATGATAGTATAGAATCC         | 1812-1836               |                     |
| racI-1  | GGGGTCGACAAATAGCCATAATAAATAAGTAACGCACAC   | (-862)-(-833)           | 701                 |
| racI-2  | CCCAAGCTTAAAAATCTTCTTTGAAAATATCCAACCTCAC  | (-143)-(-114)           |                     |
| racI-3  | GGGACTAGTTCTAAAACCTTATTGGGTTTATCATAATGC   | 1000-1029               |                     |
| racI-4  | CCCGCGGCCGCCATGTAGCATTCAAAAGCAGTACGAAGAGC | 2192-2221               |                     |
| racJ-1  | GTCGACACCATGTTATTATTATAAGCAAACG           | (-788)-(-764)           | 741                 |
| racJ-2  | AAGCTTTTACCAACTCCATCATCTCCAAGAC           | 41-65                   |                     |
| racJ-3  | TCTAGATACAAACAAAAAATCCTGTAAAACC           | 711-735                 |                     |
| racJ-4  | GCGGCCGCAAGGTTTAAATGATAACATTTTACC         | 1707-1731               |                     |
| racL-1  | GTCGACTTGGAATGGTCATTGAAATCTTTGG           | 2640-2664               | 741                 |
| racL-3  | TCTAGAATAAACTTGTTTTACCAACTGTCTCC          | 184-208                 |                     |
| racL-4  | GCGGCCGCTTATACAATAAAATAAACTGGGTCAC        | (-923)-(-899)           |                     |

Table S4. Primers used in this study

| <b><i>Dictyostelium</i> GxcT KO construct</b>   |                                                             |
|-------------------------------------------------|-------------------------------------------------------------|
| 1 SLB367-5S                                     | AAATAATGGTGGTAGTGGTTCATC                                    |
| 2 SLB367-5A                                     | AAGATGAAGAGTTTTGGACCATTG                                    |
| <b><i>Dictyostelium</i> expression plasmids</b> |                                                             |
| 3 gxcT-FS2                                      | GAAGATCTATGCAAGGACAGGGACAACAATTTTATCCCAACAACAAAAATTATCACAGC |
| 4 gxcT-IA                                       | GGGTTGTTTGGGAAGATAC                                         |
| 5 gxcT-IS                                       | TCAACTACAATATCATCTGC                                        |
| 6 gxcT-FA stop BamHI                            | CCGGATCCTTATTTTGAAGTAAATTTAATAAAGC                          |
| 7 5' SLB367                                     | CCAGATCTAATCTCCTCCAAGAAGGTAG                                |
| 8 3' SLB367                                     | CCCTCGAGTTTGAAGTAAATTTAATAAAGC                              |
| 9 racE-start                                    | AGATCTATGTCAGAAGATCAAGGTTTCAGGAGC                           |
| 10 racE-stop                                    | AGATCTTTAAAGTATAATACAACCAGATTTC                             |
| 11 racE(G20V)-1                                 | GTGATGTTGCTGTTGGTAAAACATGTC                                 |
| 12 racE(G20V)-2                                 | ACAGCAACATCACCGACAACATAC                                    |
| 13 racE(T25N)-1                                 | GCTGTTGGTAAAACTGTC                                          |
| 14 racE(T25N)-2                                 | GACAGTTTTTACCAACAGC                                         |
| 15 racE(T43A)-1                                 | GTACCAGCTGTTTTTG                                            |
| 16 racE(T43A)-1                                 | CAAAAACAGCTGGTAC                                            |
| 17 rhoA-start                                   | GGAAGATCTTCCATGGCTGCCATCC                                   |
| 18 rhoA-stop                                    | GGAAGATCTTCTCACAAGACAAGGC                                   |
| <b>Bacterial expression plasmids</b>            |                                                             |
| 15 GxcT-BamHI-3721                              | CCCGGATCCCAATTGCGTTACAAAGC                                  |
| 16 GxcT-SmaI-4725                               | CCCCCGGGTTATTTTGAAGTAAATTTAATAAAGC                          |

Table S5. Plasmids used in this study

| <b><i>Dictyostelium</i> expression</b> | <b>Primers used for construction</b> |    |    |    | <b>Drug for selection</b> | <b>References</b>              |
|----------------------------------------|--------------------------------------|----|----|----|---------------------------|--------------------------------|
| pJK1-GFP: pIS1                         |                                      |    |    |    | G418 (20 µg/ml)           | Zhang et. al. (2011)           |
| pJK1-GFP-GxcT                          | 3                                    | 4  | 5  | 6  | G418 (20 µg/ml)           | This study                     |
| pJK1-PHgxcT-GFP:pMSG-PHgxcT7           |                                      | 8  |    |    | G418 (20 µg/ml)           | This study                     |
| pJK1-PHcrac-GFP: pWF38                 |                                      |    |    |    | G418 (20 µg/ml)           | Dormann et. al. (2002)         |
| pDM181-PHcrac mCherry                  |                                      |    |    |    | G418 (20 µg/ml)           | Chen et. al. (2012)            |
| pDRH-LimEΔcoli-mRFP                    |                                      |    |    |    | Hygromycin (50 µg/ml)     | Gift from Dr. Devreotes (JHMI) |
| pJK1-GFP-RacE                          | 9                                    | 10 |    |    | G418 (20 µg/ml)           | This study                     |
| pJK1-GFP-RacE(G20V)                    | 9                                    | 10 | 11 | 12 | G418 (20 µg/ml)           | This study                     |
| pJK1-GFP-RacE(T25N)                    | 9                                    | 10 | 13 | 14 | G418 (20 µg/ml)           | This study                     |
| pJK1-GFP-RacE(G20V,T43A)               | 9                                    | 10 | 15 | 16 | G418 (20 µg/ml)           | This study                     |
| pDM323-RBD(Raf)-GFP                    |                                      |    |    |    | G418 (20 µg/ml)           | Xiong et.al. (2010)            |
| pDRH-PHcrac-RFP                        |                                      |    |    |    | Hygromycin (50 µg/ml)     | Gift from Dr. Devreotes (JHMI) |
| pJK1-GFP-RhoA                          | 17                                   | 18 |    |    | G418 (20 µg/ml)           | This study                     |
| pKJ1-GFP-RhoA(Q63L)                    | 17                                   | 18 |    |    | G418 (20 µg/ml)           | This study                     |
| <b>Bacterial expression</b>            |                                      |    |    |    |                           |                                |
| pGEX-2T                                |                                      |    |    |    |                           | Amersham                       |
| pGEX-GxcT                              | 15                                   | 16 |    |    |                           | This study                     |

## SUPPLEMENTARY INFORMATION

### Supplementary Experimental Procedures

#### Lipid dot blot assay

A lipid dot blot assay was performed as described (1, 2). Cells were cultured in HL5 medium to  $3\text{--}5 \times 10^6$  cells/ml and starved for 2 hours in DB. After washing, cells were resuspended to  $5 \times 10^7$  cells/ml in 10 mM sodium phosphate (pH 7.0) containing 1% protein inhibitor cocktail (P8340, Sigma), and filter-lysed by passing through polycarbonate membranes with  $5\text{-}\mu\text{m}$  pores (110613, Whatman) on ice. Cell lysates were clarified by centrifugation and mixed with equal volumes of 2 $\times$  binding buffer (10 mM sodium phosphate [pH 7.0], 0.5% NP40, 300 mM NaCl). Membranes spotted with different phospholipids (PIP membrane P-6001; Echelon) were blocked in PBS containing 3% fatty acid-free bovine serum albumin and then mixed with the lysates for at least 3 hours. After washing, the membranes were probed with anti-GFP antibodies followed by Alexa488-labeled anti-rabbit IgG antibodies (Invitrogen). The membranes were scanned with a PharosFX Plus molecular imager and analyzed with Quantity One software (Bio-Rad).

#### Actin polymerization assay

Differentiated cells were pretreated with 3 mM caffeine for 20 min and stimulated with  $1\text{ }\mu\text{M}$  cAMP (1, 3, 4). At various time points after stimulation,  $5 \times 10^6$  cells were harvested and lysed in Triton X-100 buffer (1% Triton X-100, 10 mM KCl, 10 mM imidazole, 10 mM EGTA,  $50\text{ }\mu\text{g/ml}$   $\text{NaN}_3$ ). Samples were vortexed, held on ice for 10 min, and then incubated at room temperature for 10 min. After centrifugation at  $8000 \times g$  for 4 min, the pellet fractions were washed and resuspended in 2 $\times$  SDS-PAGE sample buffer. Proteins were resolved by SDS-PAGE and visualized by Coomassie Brilliant Blue staining. Actin was quantified by densitometric analysis using ImageJ software.

#### GST-pull down

A GST pull-down assay was performed as described with some modification (5). GST fused to the RhoGEF and PH domains of GxcT (GST-GxcT) was expressed from pGEX-2T (GE Healthcare) in the *E. coli* BL21 strain with 0.5 mM IPTG at  $16^\circ\text{C}$  overnight. Cells were frozen in PBS containing 1 mM DTT and 1 mM PMSF at  $-80^\circ\text{C}$  for 1-2 hours and thawed in the presence of  $100\text{ }\mu\text{g/ml}$  of lysozyme on ice for 20 min. Cells were sonicated ten times (30 seconds each) on ice. After clarification by centrifugation, cell lysates mixed with glutathione Sepharose 4B (GE Healthcare) at  $4^\circ\text{C}$  for 1 hour. After washing, GST-GxcT beads were kept at  $4^\circ\text{C}$ . To prepare *Dictyostelium* cell lysates, cells expressing GFP or GFP-RacE were starved for 3 hours and lysed in lysis buffer (25 mM Tris-HCl, 150 mM NaCl, 0.5% Triton X-100, 1 mM NaF, 0.5 mM  $\text{Na}_3\text{VO}_4$ , 1 mM DTT, 10% glycerol, and protease-inhibitor cocktail [Roche]) with or without 20 mM EDTA on ice for 10 min. After clarification by centrifugation, cell lysates were diluted with 4 $\times$  volumes of dilution buffer (25 mM Tris-HCl, 15 mM NaCl, 1 mM NaF, 1 mM DTT, 10% glycerol, and protease-inhibitor cocktail) with or without 20 mM EDTA. GST-GxcT or GST beads were added to the cell lysates and incubated at  $4^\circ\text{C}$  overnight. After washing with dilution buffer, bound proteins were eluted with 2 $\times$  SDS-PAGE sample buffer and analyzed by SDS-PAGE and immunoblotting using anti-GFP antibodies.

## Supplementary Figure Legends

**Fig. S1. Cytokinesis defects in *gxcT* cells and localization of the PH domain of GxcT.** (A) DAPI staining showed that *gxcT* cells, grown as described in Fig. S6A, were multinucleated, similar to *racE* cells. This result suggests that *gxcT* cells have cytokinesis defects. To avoid multinucleation in *gxcT* cells, we grew this mutant strain as adherent cells on Petri-dishes for all other experiments described in this study. (B) The number of nuclei per cell was quantified using the DAPI-stained cells described in (A). Values represent the mean  $\pm$  SEM ( $n = 3$ ). (C) WT cells, *gxcT* cells, and *gxcT* cells expressing GFP-GxcT were plated on bacterial lawn and examined for the formation of fruiting bodies. (D) WT cells expressing GFP fused to the PH domain of GxcT or Crac were observed by fluorescence microscopy.

**Fig. S2. *gxcT* and *racE* cells are defective in chemotaxis after longer starvation and normally express cAR1.** (A) WT, *gxcT* and *racE* cells were developed for 8 hours and placed in a chemoattractant gradient, established by a micropipette releasing cAMP, and observed for 15 min by phase contrast microscopy. The trajectories of cell migration are shown. These chemotaxis assays were then quantified (B-D). Values represent the mean  $\pm$  SEM ( $n = 3$ ). At least 10 cells were analyzed for each experiment.  $*p < 0.05$ ;  $***p < 0.001$ . (E) Whole cell lysates were prepared from WT, *gxcT* and *racE* cells and analyzed by immunoblotting using antibodies to cAR1 and actin.

**Fig. S3. The localization of Ras activation is independent of PIP3.** WT cells expressing RBD-GFP were exposed to a cAMP gradient in the presence of Latrunculin A (5  $\mu$ M) and LY294002 (20  $\mu$ M). Images were taken 1 min after the cAMP gradient was formed. White dots indicate the position of the micropipette tip that was releasing cAMP.

**Fig. S4. Disruption of the genes encoding the Rho family of GTPases.** 13 Rho family genes were deleted using homologous recombination in *Dictyostelium*. The blasticidin resistance cassette (BSR) was inserted into each Rho gene in the indicated regions. The PCR primers used to make the disruption constructs are listed in Table S2, and their position within the genome relative to the gene sequence is indicated by the numbers (1-4) after the oligo name. The restriction enzyme sites used for cloning are also shown. The depictions shown for each genomic region were modified from [www.dictybase.org](http://www.dictybase.org).

**Fig. S5. The growth phenotypes of Rho family GTPase knockout strains.** (A) Cells were cultured in suspension, shaking at 180 rpm on a rotary shaker, in HL5 medium at 22°C. Each mutant strain was counted daily with a hemocytometer. Values represent the mean  $\pm$  SEM ( $n \geq 3$ ). (B) WT, *racC* and *racE* cells were stained with DAPI to visualize nuclei after cultured in the HL5 medium for 3 days. Unlike the majority of WT cells, *racC* and *racE* cells were multinucleated, suggesting impaired cytokinesis, consistent with previous reports (6, 7). It is known that *Dictyostelium* cells that have cytokinesis defects become multinucleated when grown in suspension culture (8). To avoid multinucleation in *racE* cells, we grew this mutant strain as adherent cells on Petri-dishes for all other experiments described in this study. (C) The number of nuclei per cell was quantified using the DAPI-stained cells. (D and E) Cells were cultured as in (A) until they reached the exponential growth phase, at which point they were plated clonally on bacterial lawns and incubated at 22°C for 5 days to monitor growth and plaque formation.

**Fig. S6. The developmental phenotypes of Rho family GTPase knockout strains.** To examine developmental phenotypes, cells were plated at a density of  $5 \times 10^5$  cells/cm<sup>2</sup> on 1% non-nutrient DB agar. Images were taken at various time points, as indicated, after the cells were plated on DB agar.

**Fig. S7. GFP-RacE rescues growth and chemotaxis defects in *racE*<sup>-</sup> cells.** (A) WT cells, *racE*<sup>-</sup> cells, and *racE*<sup>-</sup> cells expressing GFP-RacE were cultured in HL5 medium and counted daily with a hemocytometer. Values represent the mean  $\pm$  SEM ( $n = 3$ ). (B) Developed *racE*<sup>-</sup> cells and *racE*<sup>-</sup> cells expressing GFP-RacE were placed in a cAMP gradient and observed for 30 min by phase contrast microscopy.

**Fig. S8. GFP-RacE rescues gradient sensing defects in *racE*<sup>-</sup> cells.** The average of the absolute value of  $\Phi$  for PHrac-RFP crescents was calculated from the time-lapse analyses in *racE*<sup>-</sup> cells (A) and *gxcT* cells (B). Values represent the mean  $\pm$  SEM.  $n$  indicates the number of cells analyzed. \* $p < 0.05$ ; \*\* $p < 0.01$ .

**Fig. S9. GxcT binds to Rac1C, RacC, RacE and RacF1.** *Dictyostelium* cell lysates were prepared from cells expressing HA-tagged Rac1C, RacE or RacF1 (A) and HA-tagged Rac1C, RacC or RacF1 (B). These lysates were incubated with cell extracts expressing FLAG-tagged RhoGEF and PH domains of GxcT (FLAG-GxcT). FLAG-GxcT was immunoprecipitated and the bound fractions were analyzed by Western blotting with antibodies to the HA and FLAG epitopes. The input and bound (Ppt) fractions are shown. An asterisk indicates non-specific bands.

**Fig. S10. Analyses of GFP-RacE localization.** (A) *racE*<sup>-</sup> cells expressing GFP-RacE were examined by fluorescence microscopy in the presence or absence of Latrunculin A (5  $\mu$ M). Asterisks indicate higher concentrations of cAMP in a gradient. (B) WT cells expressing GFP-RacE(G20V) were examined by fluorescence microscopy at the indicated concentrations of Latrunculin A.

**Fig. S11. The localization of RacE(G20V) and GFP-RacE(G20V, T43A) in a cAMP gradient in the presence of Latrunculin A.** WT cells expressing GFP-RacE(G20V) or GFP-RacE(G20V, T43A) were observed in the presence of Latrunculin. White asterisks indicate the position of the cAMP-releasing micropipette tips

## Supplementary References

1. Chen CL, Wang Y, Sesaki H, & Iijima M (2012) Myosin I Links PIP3 Signaling to Remodeling of the Actin Cytoskeleton in Chemotaxis. *Science signaling* 5(209):ra10.
2. Zhang P, Wang Y, Sesaki H, & Iijima M (2010) Proteomic identification of phosphatidylinositol (3,4,5) triphosphate-binding proteins in *Dictyostelium discoideum*. *Proc Natl Acad Sci U S A*.
3. Iijima M & Devreotes P (2002) Tumor suppressor PTEN mediates sensing of chemoattractant gradients. *Cell* 109(5):599-610.

4. Wang Y, *et al.* (2011) Dictyostelium huntingtin controls chemotaxis and cytokinesis through the regulation of myosin II phosphorylation. *Mol Biol Cell* 22(13):2270-2281.
5. Cai H, Huang CH, Devreotes PN, & Iijima M (2012) Analysis of chemotaxis in Dictyostelium. *Methods in molecular biology* 757:451-468.
6. Larochelle DA, Vithalani KK, & De Lozanne A (1996) A novel member of the rho family of small GTP-binding proteins is specifically required for cytokinesis. *J Cell Biol* 133(6):1321-1329.
7. Han JW, Leeper L, Rivero F, & Chung CY (2006) Role of RacC for the regulation of WASP and phosphatidylinositol 3-kinase during chemotaxis of Dictyostelium. *J Biol Chem* 281(46):35224-35234.
8. Robinson DN & Spudich JA (2004) Mechanics and regulation of cytokinesis. *Curr Opin Cell Biol* 16(2):182-188.
9. Larochelle DA, Vithalani KK, & De Lozanne A (1996) A novel member of the rho family of small GTP-binding proteins is specifically required for cytokinesis. *J Cell Biol* 133(6):1321-1329.
10. Han JW, Leeper L, Rivero F, & Chung CY (2006) Role of RacC for the regulation of WASP and phosphatidylinositol 3-kinase during chemotaxis of Dictyostelium. *J Biol Chem* 281(46):35224-35234.
11. Robinson DN & Spudich JA (2004) Mechanics and regulation of cytokinesis. *Curr Opin Cell Biol* 16(2):182-188.
12. Ruchira, Hink MA, Bosgraaf L, van Haastert PJ, & Visser AJ (2004) Pleckstrin homology domain diffusion in Dictyostelium cytoplasm studied using fluorescence correlation spectroscopy. *J Biol Chem* 279(11):10013-10019.
13. Sawai S, Guan XJ, Kuspa A, & Cox EC (2007) High-throughput analysis of spatio-temporal dynamics in Dictyostelium. *Genome biology* 8(7):R144.
14. Park KC, *et al.* (2004) Rac regulation of chemotaxis and morphogenesis in Dictyostelium. *Embo J* 23(21):4177-4189.
15. Geissler H, Ullmann R, & Soldati T (2000) The tail domain of myosin M catalyses nucleotide exchange on Rac1 GTPases and can induce actin-driven surface protrusions. *Traffic* 1(5):399-410.
16. Mondal S, Neelamegan D, Rivero F, & Noegel AA (2007) GxcDD, a putative RacGEF, is involved in Dictyostelium development. *BMC cell biology* 8:23.
17. Strehle A, Schleicher M, & Faix J (2006) Trix, a novel Rac guanine-nucleotide exchange factor from Dictyostelium discoideum is an actin-binding protein and accumulates at endosomes. *European journal of cell biology* 85(9-10):1035-1045.
18. Wilkins A, *et al.* (2005) The Dictyostelium genome encodes numerous RasGEFs with multiple biological roles. *Genome biology* 6(8):R68.
19. Muramoto T & Urushihara H (2006) Small GTPase RacF2 affects sexual cell fusion and asexual development in Dictyostelium discoideum through the regulation of cell adhesion. *Development, growth & differentiation* 48(3):199-208.
20. Somesh BP, *et al.* (2006) RacG regulates morphology, phagocytosis, and chemotaxis. *Eukaryot Cell* 5(10):1648-1663.
21. Dormann D, Weijer G, Parent CA, Devreotes PN, & Weijer CJ (2002) Visualizing PI3 kinase-mediated cell-cell signaling during Dictyostelium development. *Curr Biol* 12(14):1178-1188.

22. Xiong Y, Huang CH, Iglesias PA, & Devreotes PN (2010) Cells navigate with a local-excitation, global-inhibition-biased excitable network. *Proceedings of the National Academy of Sciences of the United States of America* 107(40):17079-17086.
23. Plak K, *et al.* (2013) GxcC connects Rap and Rac signaling during Dictyostelium development. *BMC cell biology* 14:6.
